# Supplementary material for: MDM2 is a potential therapeutic target and prognostic factor for ovarian clear cell carcinomas with wild type TP53
Source: PubMed Central journal article supplement (PMC5342744; doi:10.18632/oncotarget.12175), 2016-09-21
Supplement: oncotarget-07-75328-s001.pdf [file oncotarget-07-75328-s001.pdf]

# MDM2 is a potential therapeutic target and prognostic factor for ovarian clear cell carcinomas with wild type TP53

## SUPPLEMENTARY FIGURES AND TABLE

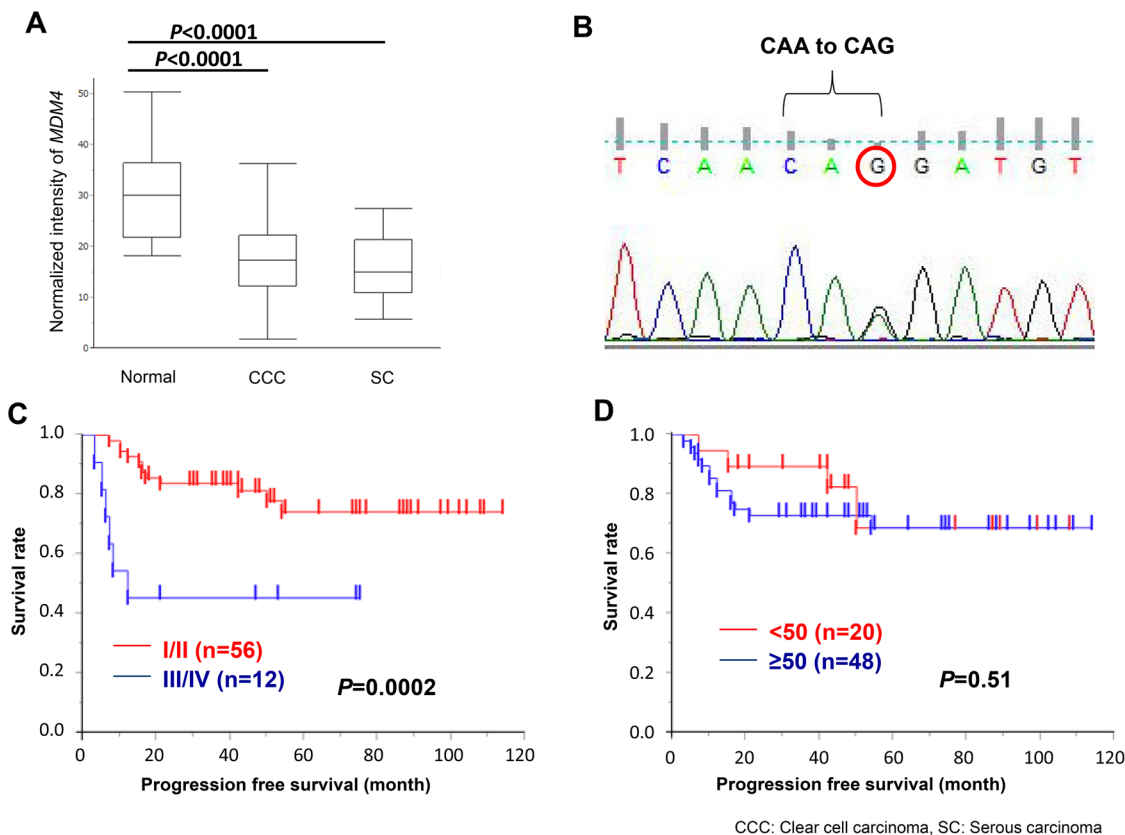

**Supplementary Figure 1: Expression of MDM4 in normal tissues and ovarian cancers, identification of TP53 mutations, and progression-free survival (PFS) analysis.** **A.** Comparison (t-test) of *MDM4* expression in normal tissues (n=13) and clear cell (n=75), and high-grade serous carcinomas (n=16). **B.** Identification of *TP53* mutation (A395G, K132R) by Sanger sequencing. **C** and **D.** Kaplan-Meier analysis of clear cell carcinomas by stage (C) and age (D)

**A**

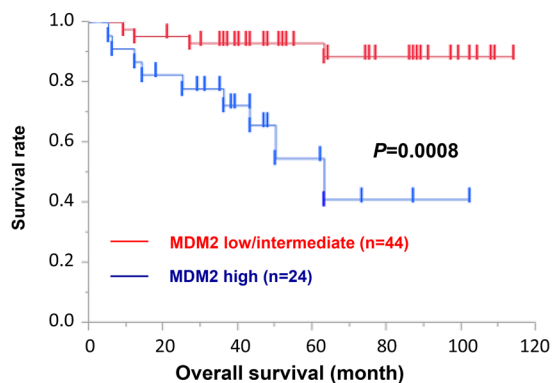

**B**

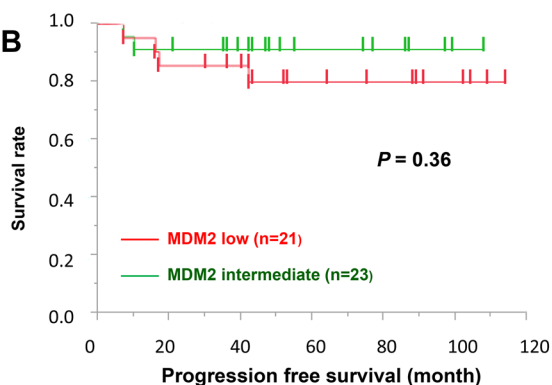

**C**

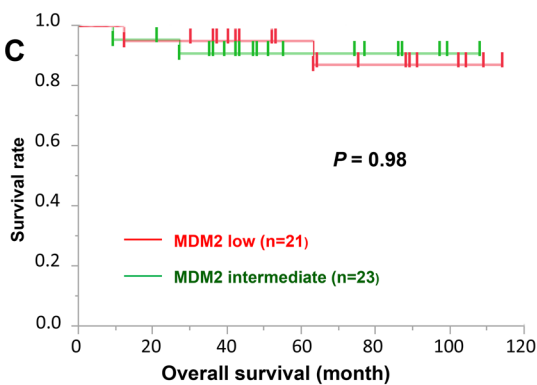

**Supplementary Figure 2: Expression of MDM2 and prognosis in clear cell carcinomas.** **A.** Comparison of overall survival (OS) between MDM2-high group and MDM2-low/intermediate group by Kaplan-Meier analysis. **B** and **C.** Comparison of PFS (B) and OS (C) among MDM2-high, -intermediate, and -low groups. PFS and OS were not significantly distinct between the MDM2-intermediate and MDM2-low groups.

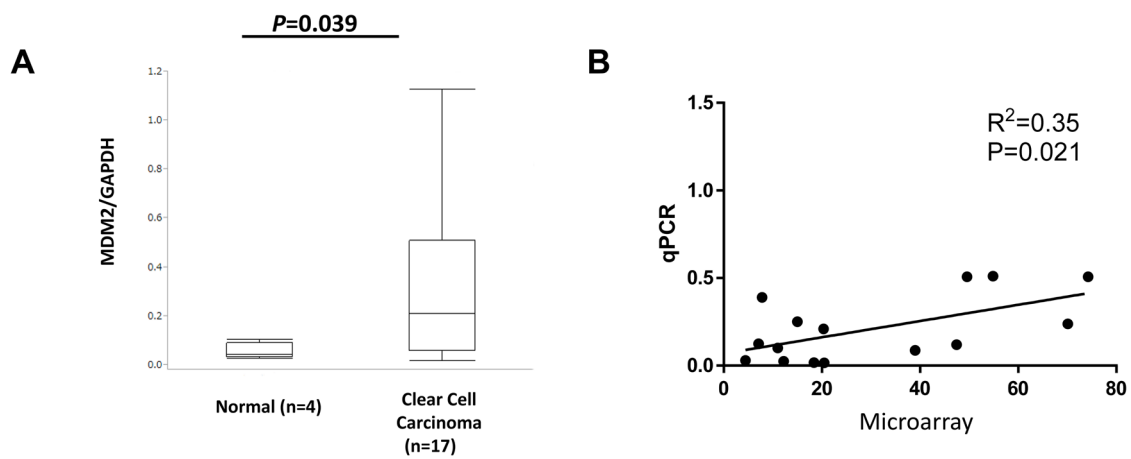

**Supplementary Figure 3: Expression of MDM2 determined by real-time PCR (qPCR) in clinical samples. A.** Comparison (t-test) of *MDM2* expression between 4 normal ovarian tissues and 17 clear cell carcinomas. **B.** Correlation analysis between qPCR and microarray data in the assessment of *MDM2* expression in clear cell carcinomas. Two of 17 samples were excluded as outliers. The R squared value was calculated by the Pearson correlation test, and the P value was determined by two-tailed t-test.

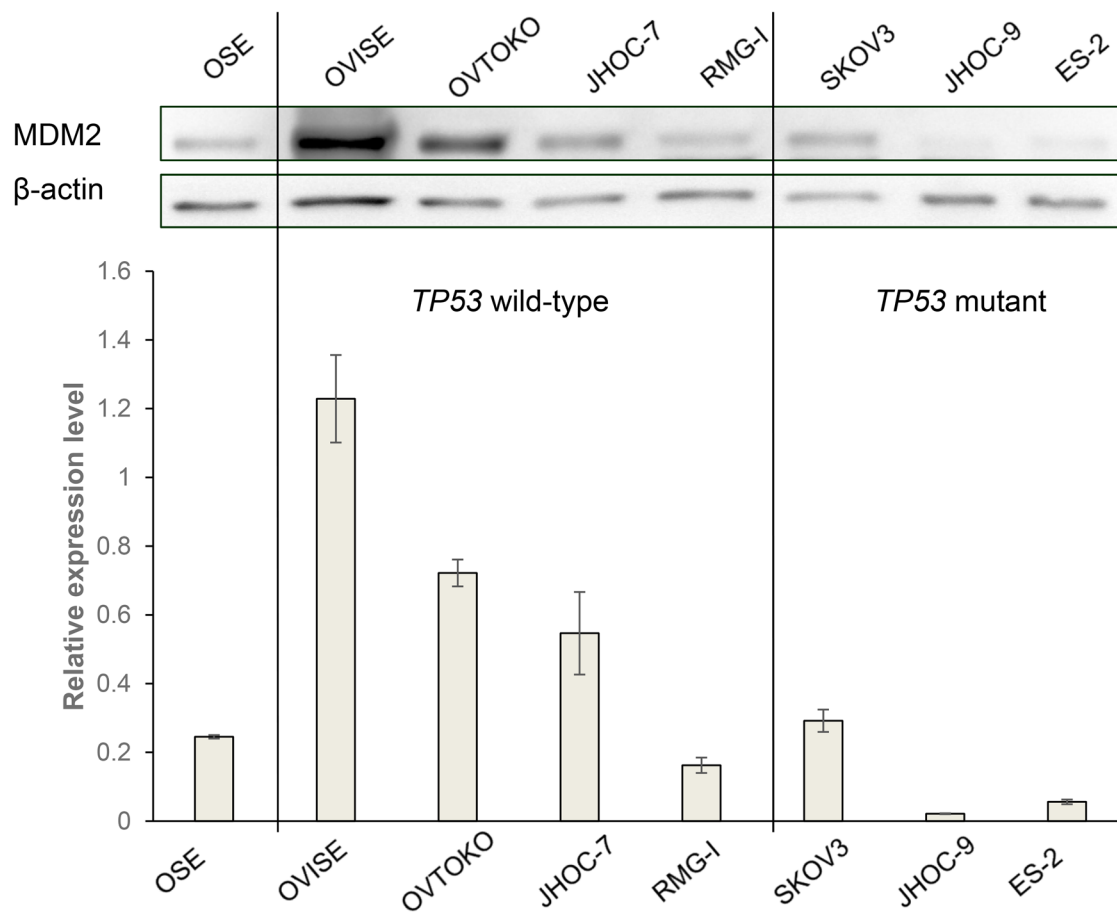

**Supplementary Figure 4: Expression of MDM2 in clear cell carcinoma cell lines determined by western blotting.** An immortalized cell line from ovarian surface epithelium (OSE) was used as a control. Expression of each protein relative to beta-actin was quantified in Image J. All experiments were repeated three times.

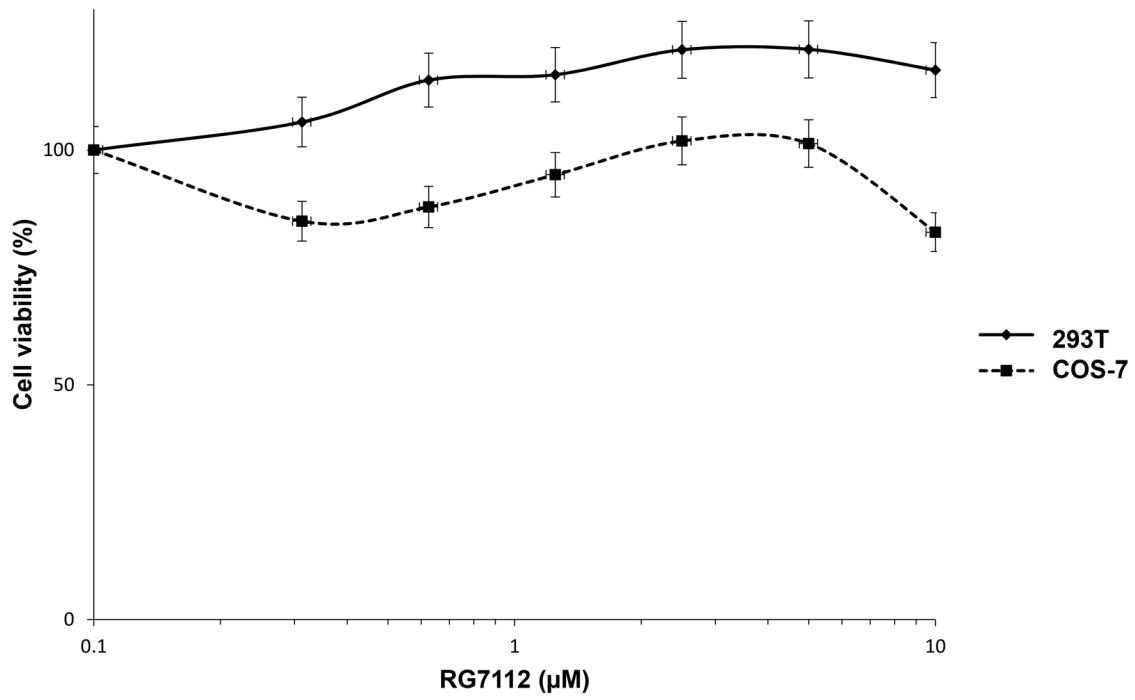

**Supplementary Figure 5: Cell viability, as measured by MTT assay, in normal cells.** COS-7 and 293T are derived from African Green Monkey fibroblast-like kidney cells and human embryonic kidney cells, respectively.

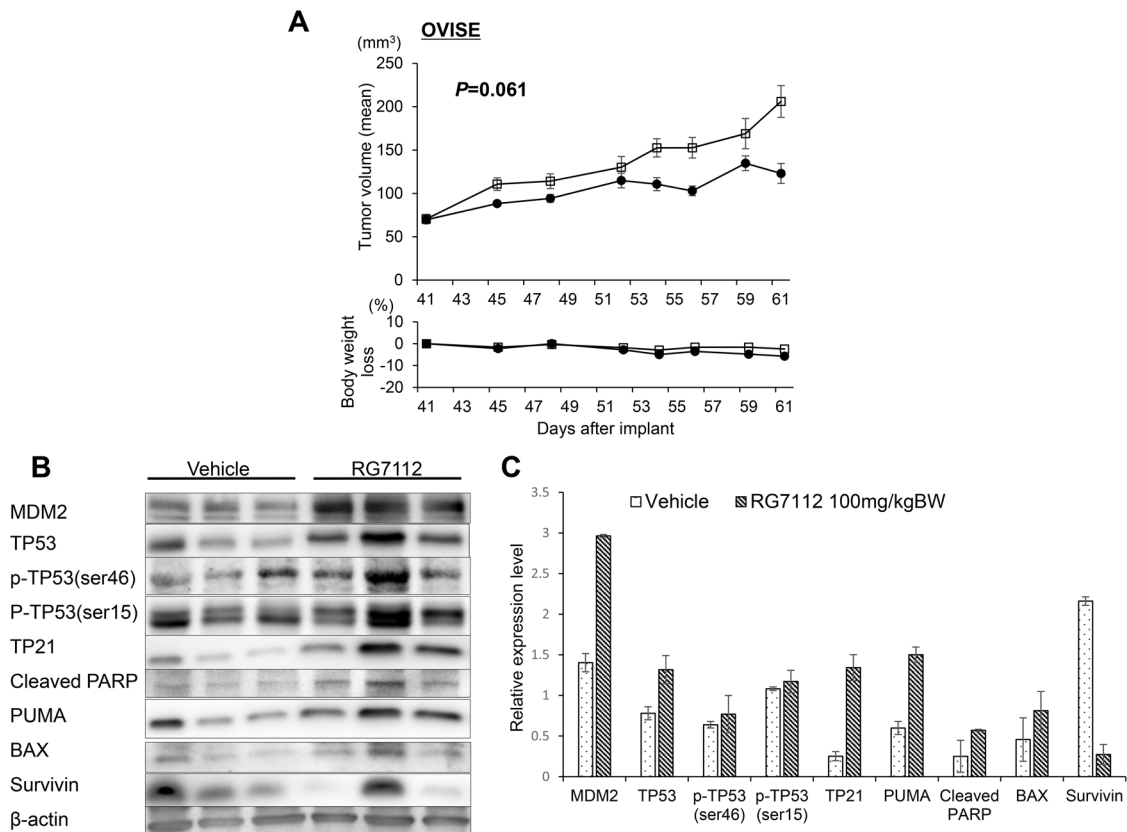

**Supplementary Figure 6: *in vivo* evaluation of efficacy of RG7112 using xenografted OVISE cells.** **A.** Tumor size and body weight in xenograft mouse models orally treated with RG7112 were measured after the start of RG7112 treatment 21 days post implantation. **B.** TP53 phosphorylation, expression of TP53 target proteins, and cleaved PARP were compared between tumors from control and RG7112-treated animals (n = 3 per group). **C.** Expression of each protein relative to beta-actin was quantified in Image J. All experiments were repeated thrice.

**A** OVTOKO

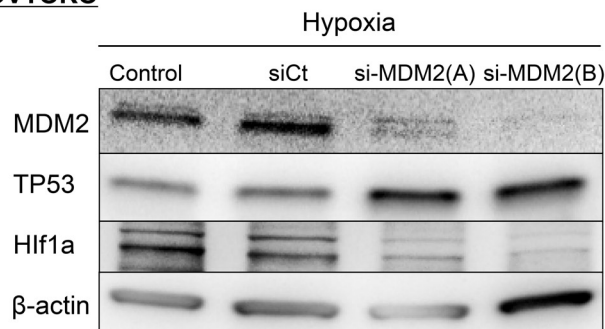

**B**

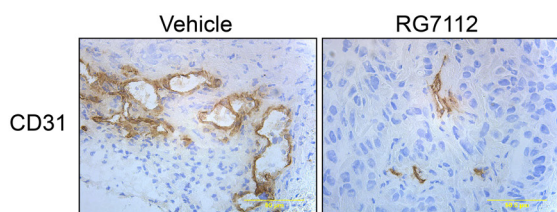

**C**

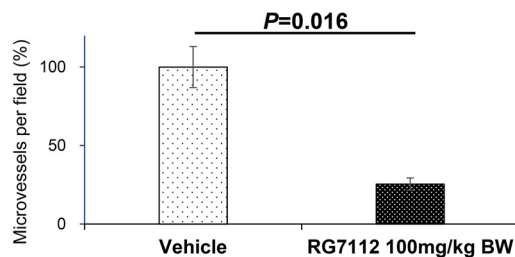

**Supplementary Figure 7: Suppression of HIF-1alpha in hypoxic condition and inhibition of microvessel formation by MDM2 inhibition.** **A.** Expression levels of MDM2, TP53, and HIF-1alpha were evaluated under hypoxic condition (1% O<sub>2</sub>) after siRNA knockdown of MDM2 in OVTOKO cells using MDM2-A and MDM2-B. si-Ct (negative control siRNA) was used as a control. **B.** Immunohistochemical staining of CD31 to detect microvessels in OVISE tumors from control and RG7112-treated mice. **C.** Microvessels per field was calculated in OVISE tumors from control and RG7112-treated mice, and compared by t-test.

**Supplementary Table 1: Patient characteristics, expression levels of MDM2/MDM4 and TP53 status in 91 ovarian carcinomas**

See Supplementary File 1
